# Supplementary material for: Gold nanoparticles tune the activity of laccase in anionic reverse micelles
Source: Royal Society of Chemistry journal article supplement (doi:10.1039/c4sm01127a), 2014-06-19
Supplement: c4sm01127a1.pdf [file c4sm01127a1.pdf]

## Supplementary Information

### Gold nanoparticles tune the activity of laccase in anionic reverse micelles †

Xinxin Yu<sup>a</sup>, Feixue Zou<sup>a</sup>, Peipei Yao<sup>a</sup>, Xirong Huang<sup>a, b,\*</sup>, Yinbo Qu<sup>b</sup>

<sup>a</sup>Key Laboratory of Colloid & Interface Chemistry of the Education Ministry of China, Shandong University, Jinan 250100, PR China.

<sup>b</sup>State Key Laboratory of Microbial Technology of China, Shandong University, Jinan 250100, PR China.

**Table S1. Experimental dosage for the preparation of GNP of different sizes and the basic properties of GNP obtained.**

| No. | Volume of citrate<br>(1% by weight)<br>μL | Color    | $\lambda_{\max}$<br>nm | Particle size<br>nm |
|-----|-------------------------------------------|----------|------------------------|---------------------|
| 1   | 500                                       | Dark red | 520                    | 8                   |
| 2   | 420                                       | Red      | 525                    | 13                  |
| 3   | 380                                       | Red      | 529                    | 20                  |

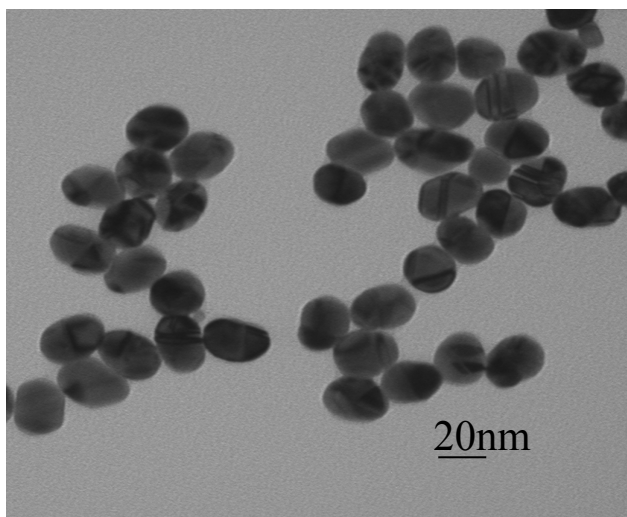

**Fig. S1** TEM image of GNP<sub>529</sub>.

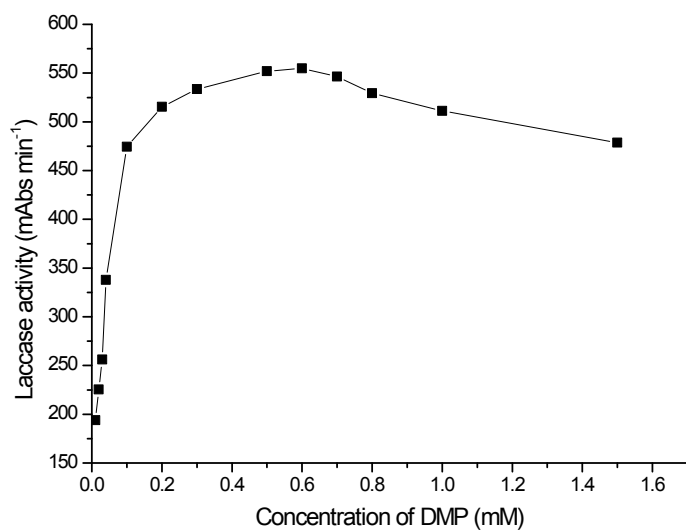

**Fig. S2** Variation of laccase activity in AOT reverse micelle with DMP concentrations. [AOT] = 50 mM,  $\omega_0 = 40$ , [laccase] = 0.022  $\mu$ M.

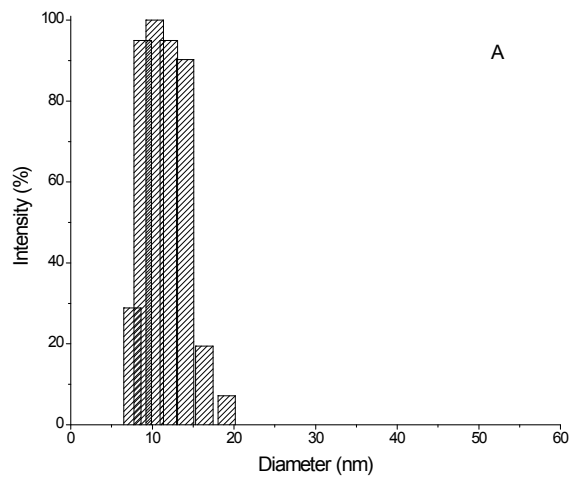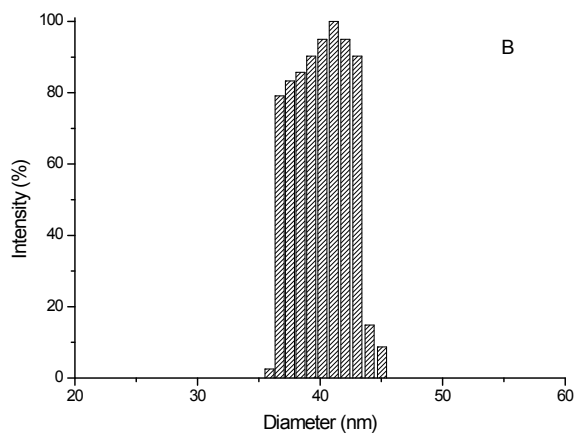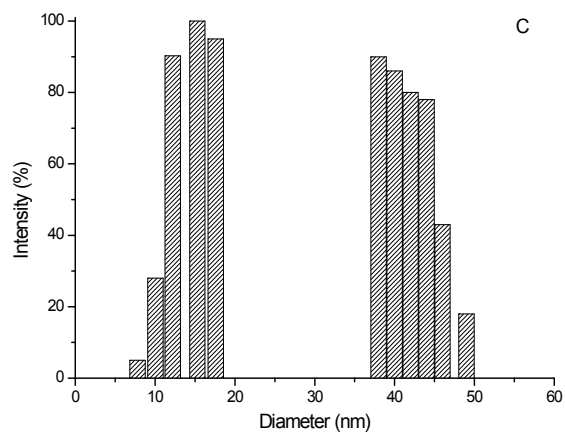

**Fig. S3 Sizes of the hollow AOT reverse micelle without GNP (A) and the GNP-containing micelle (B & C) without (B) and with (C) pretreatment by centrifugation.**
